# Supplementary material
Source: PubMed Central journal article supplement (PMC3083918)
Supplement: supp_fj.09-141754_09-141754SuppData.doc.pdf [file supp_fj.09-141754_09-141754SuppData.doc.pdf]

**A**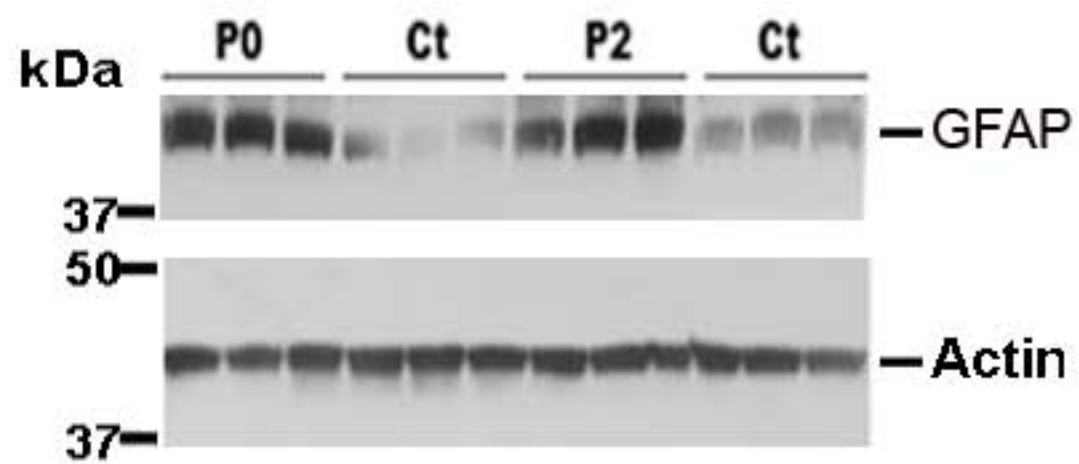**B**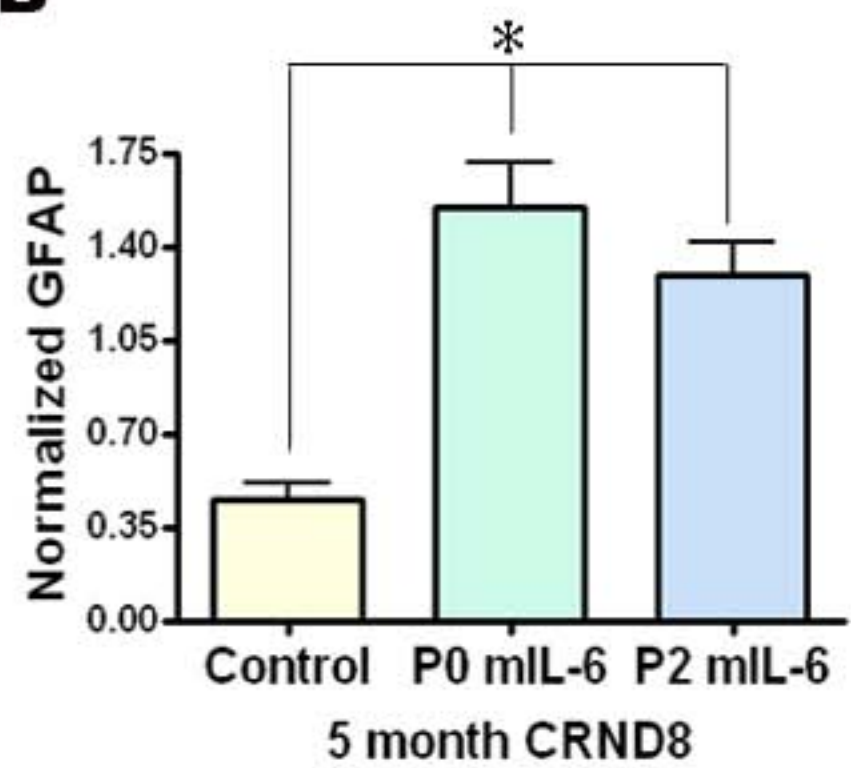**GFAP****NonTg-Control NonTg-mIL6**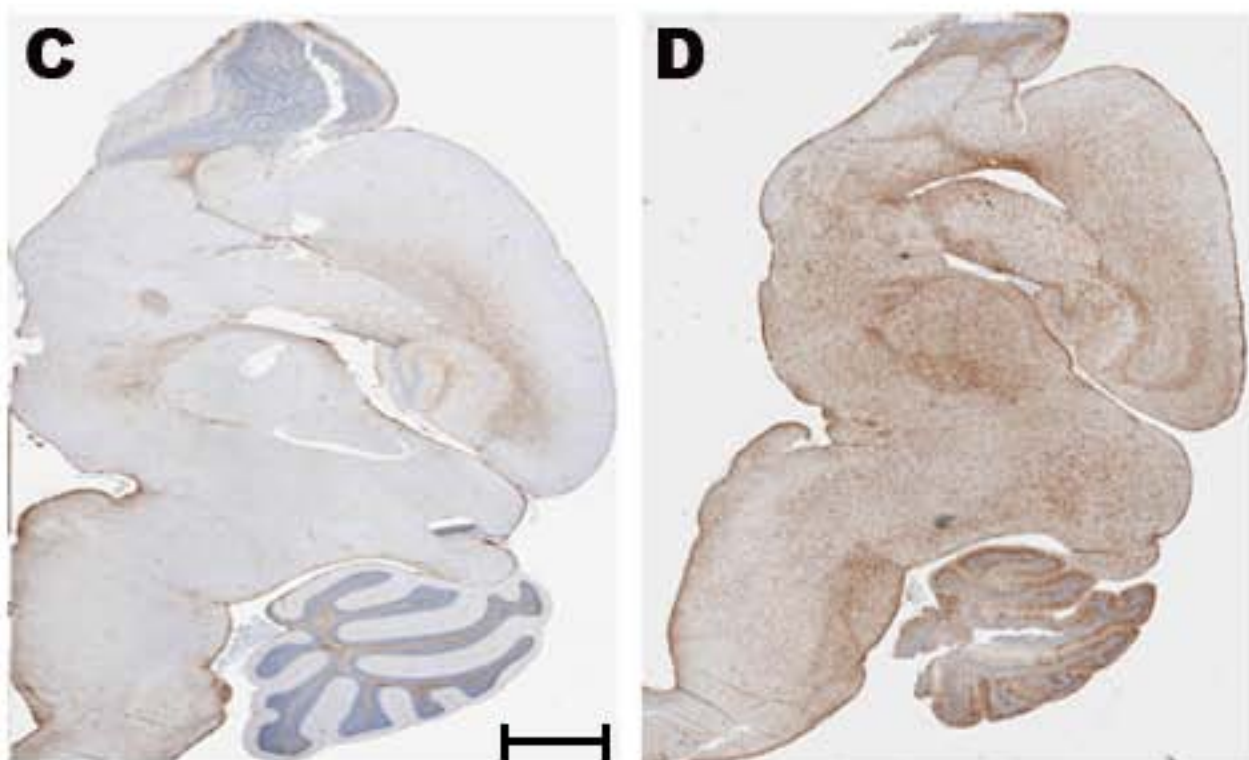**Iba-1****NonTg-Control NonTg-mIL6**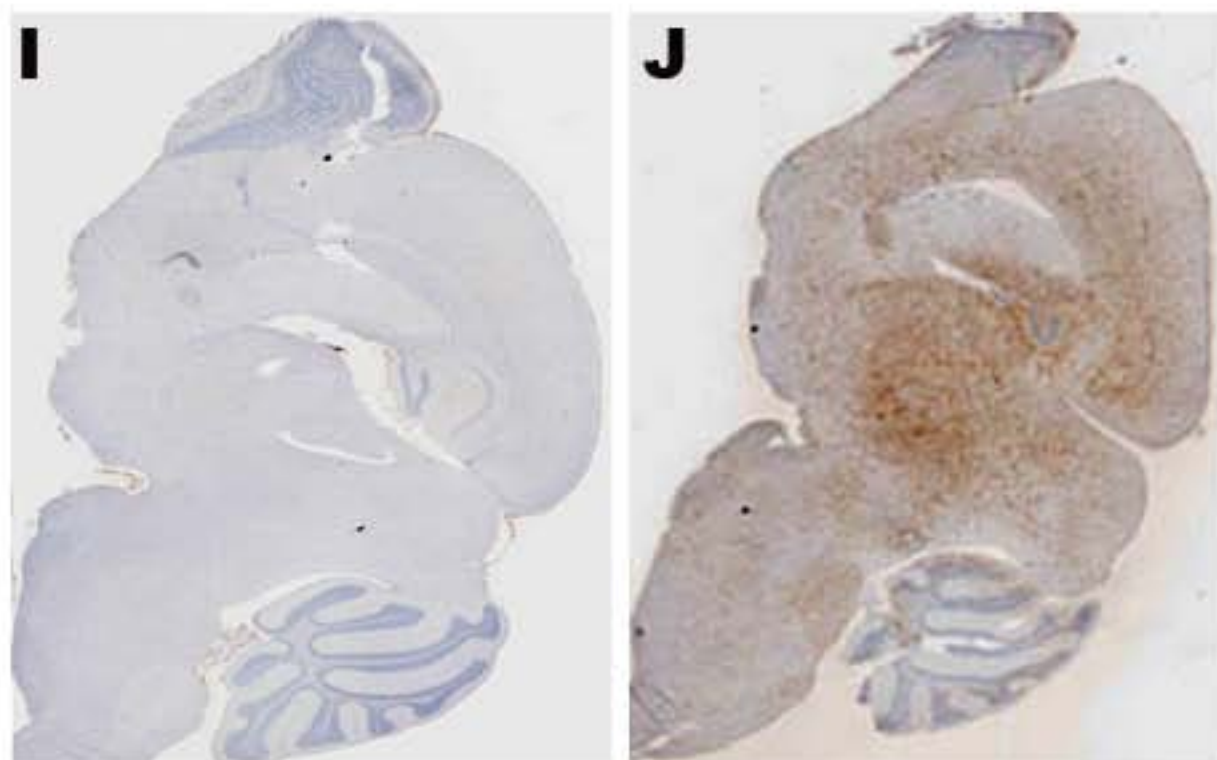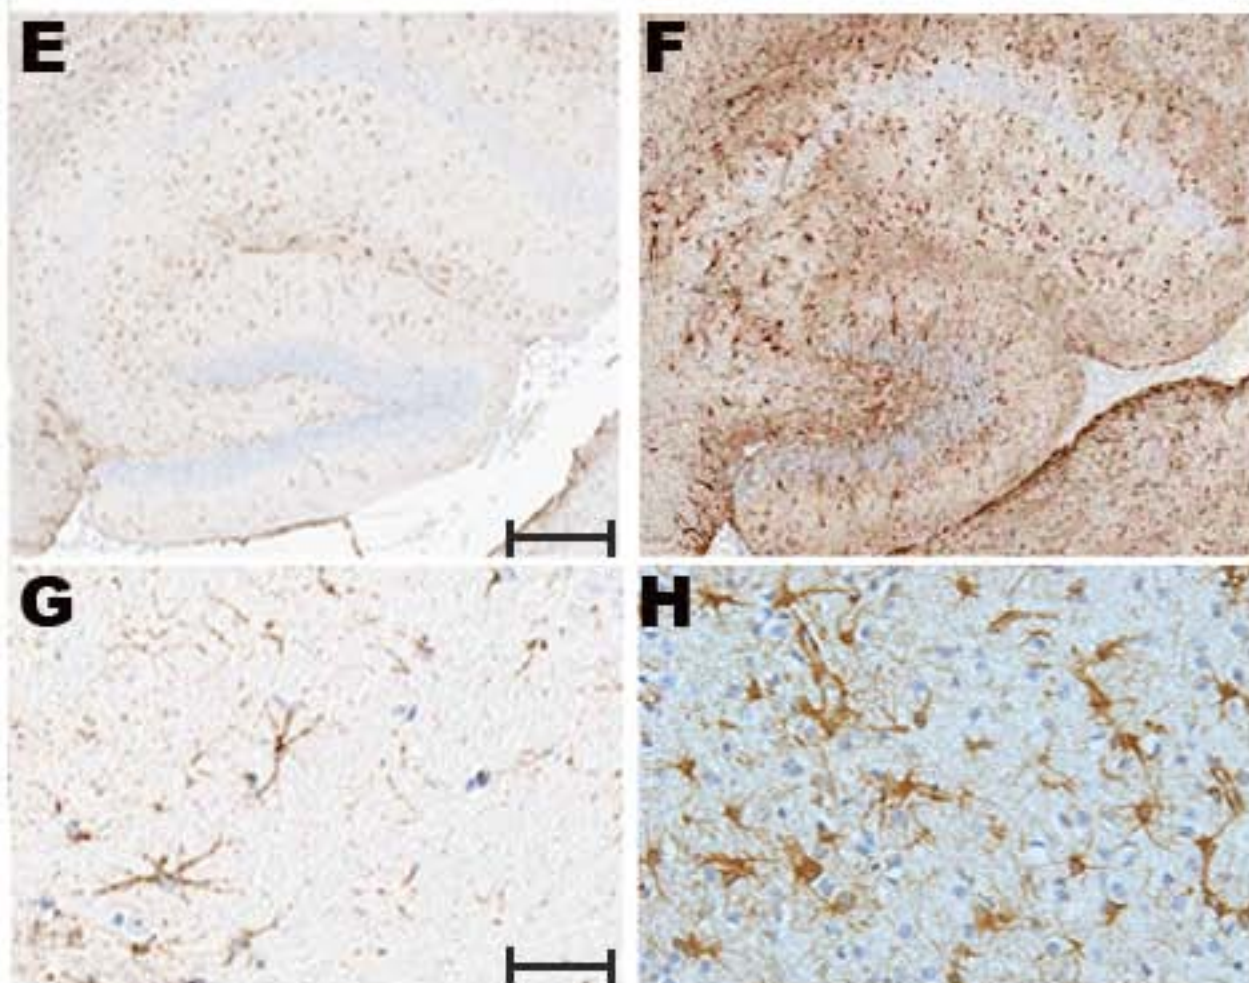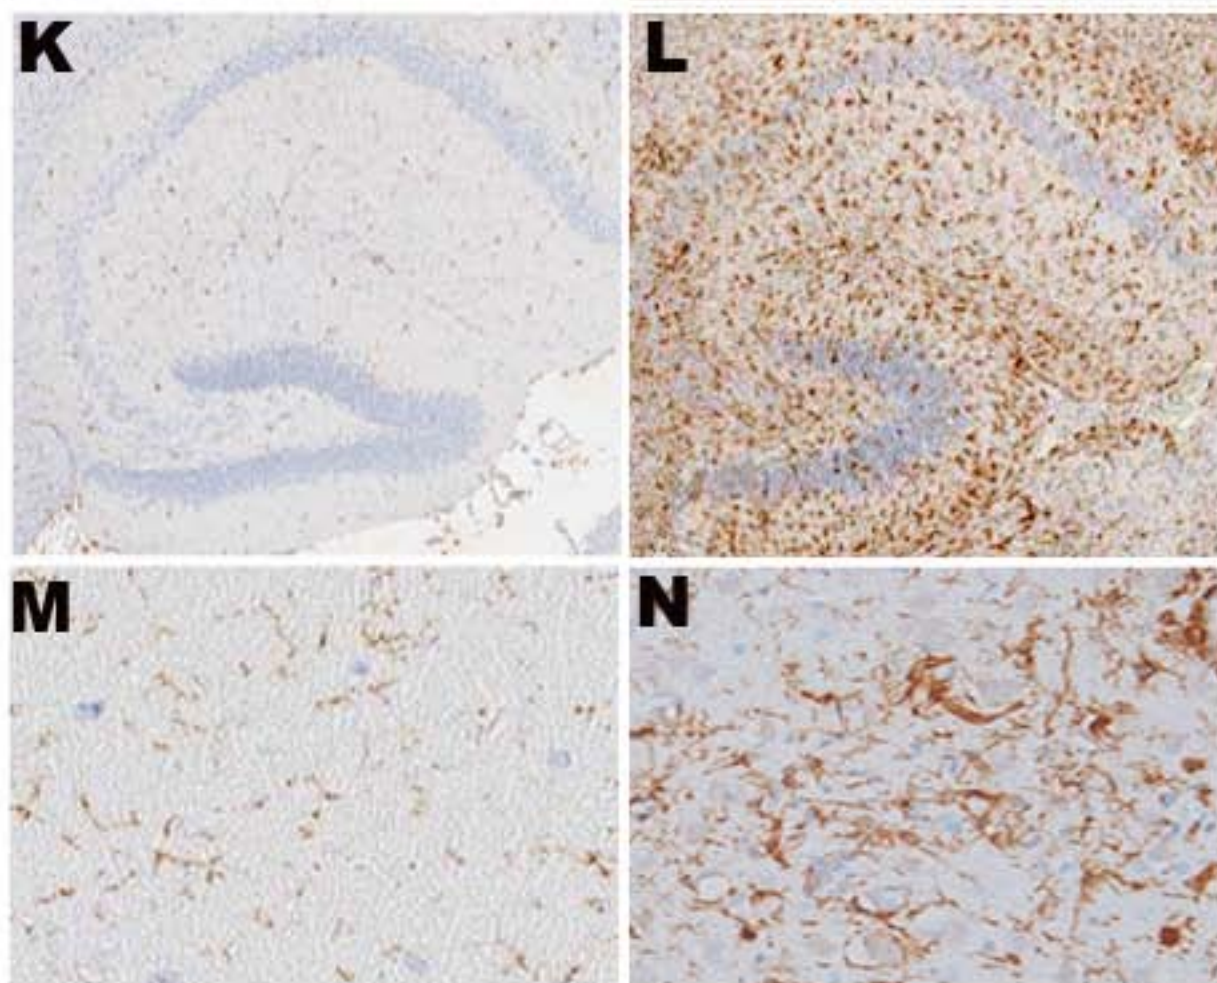**Suppl. Fig.1**

**GFAP****Iba-1****Tg-Control****Tg-mIL-6****Tg-Control****Tg-mIL-6**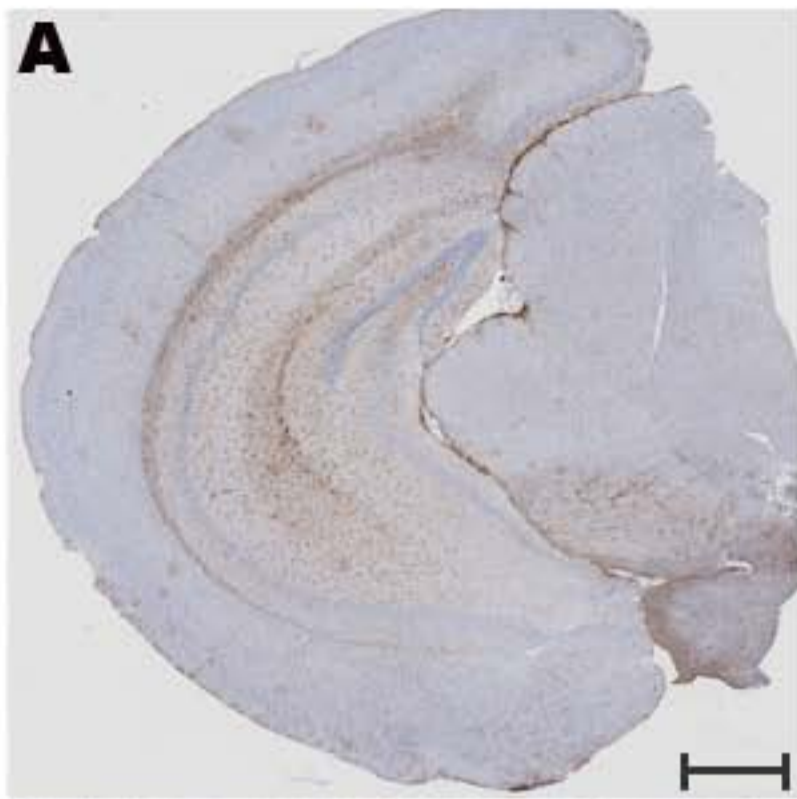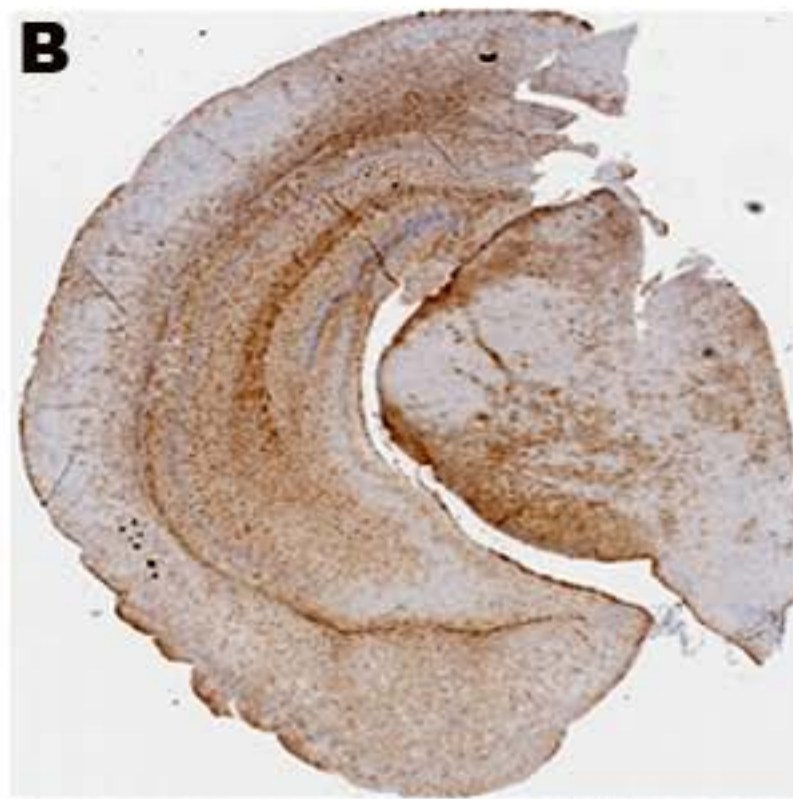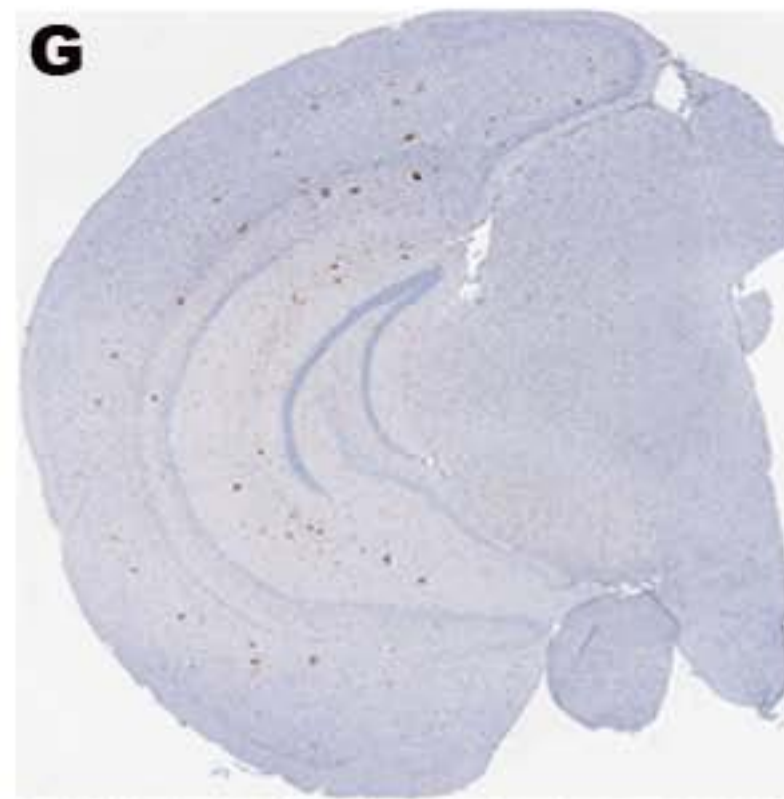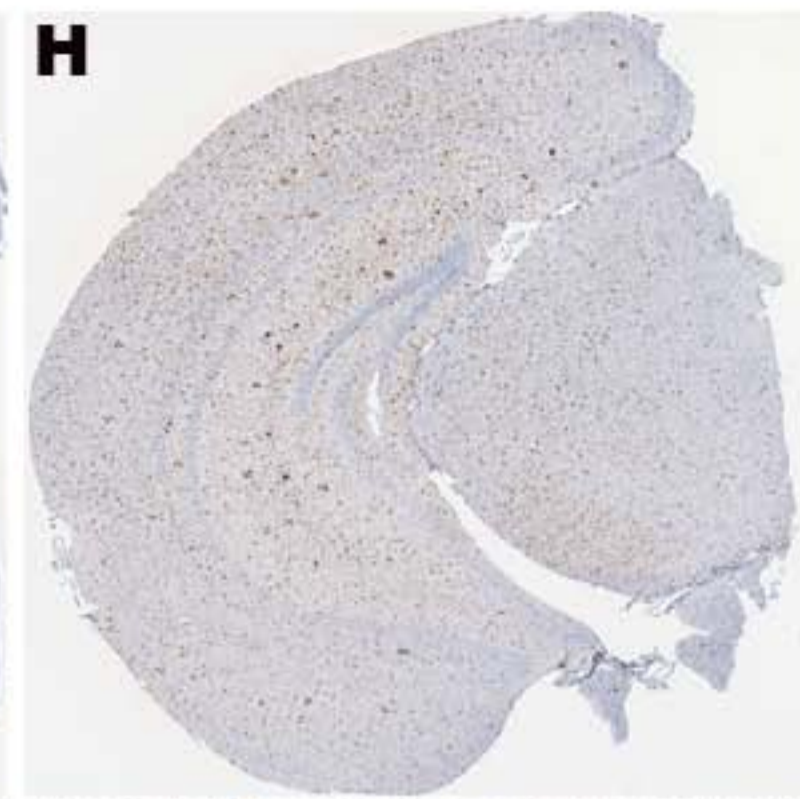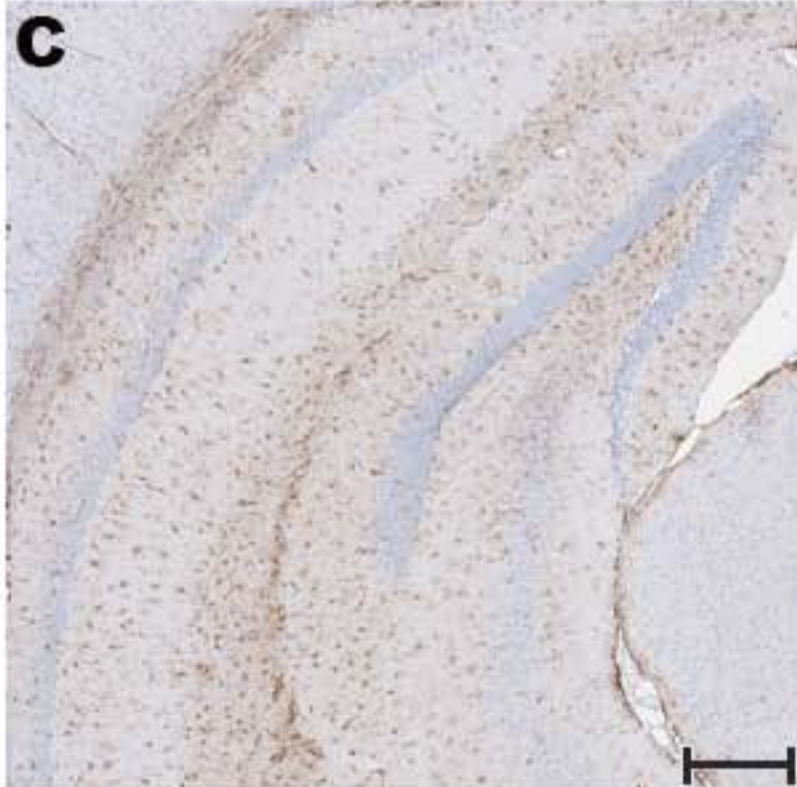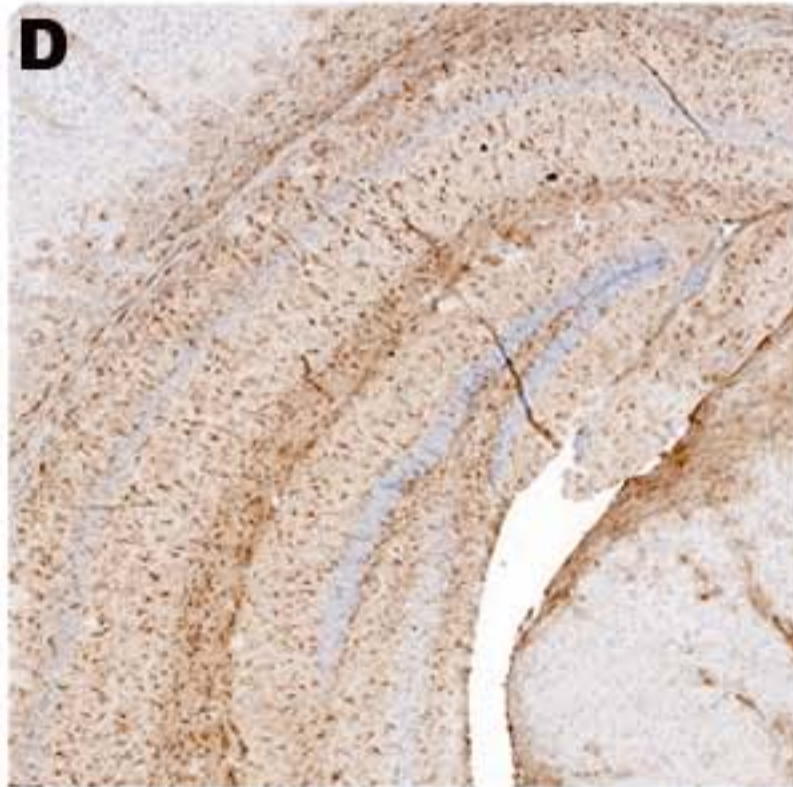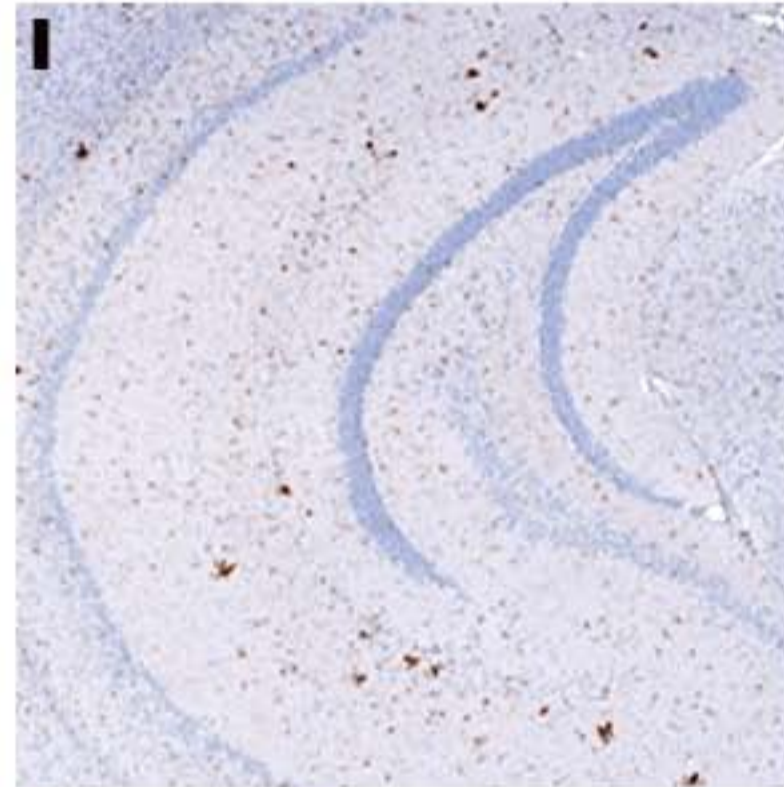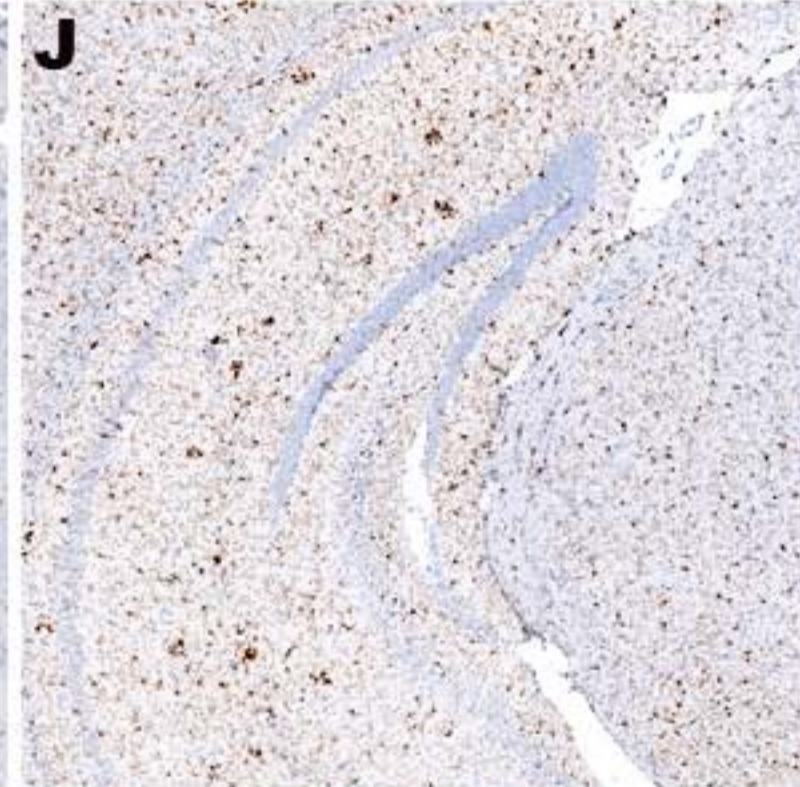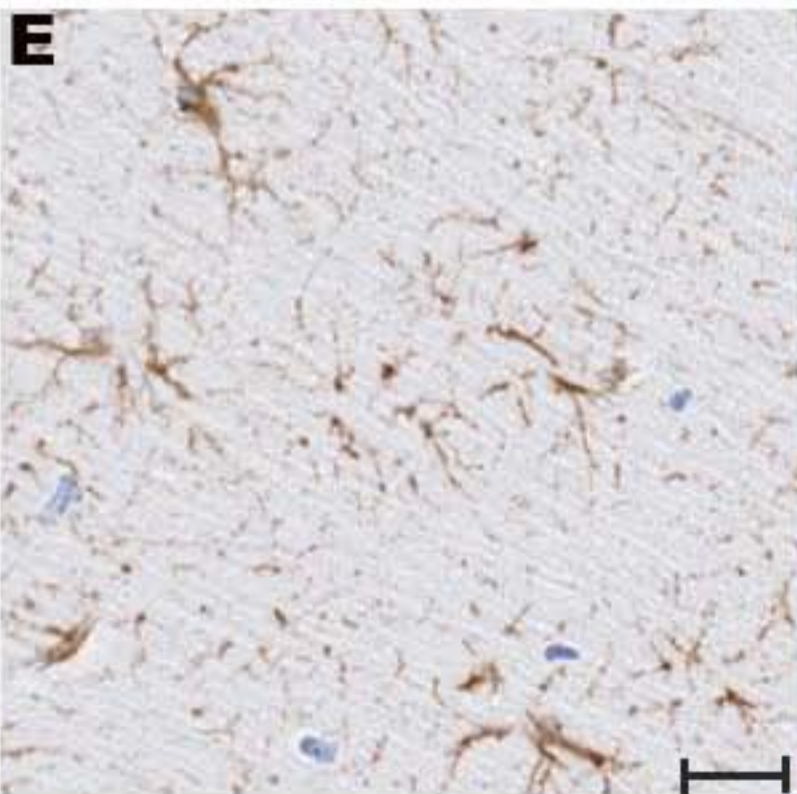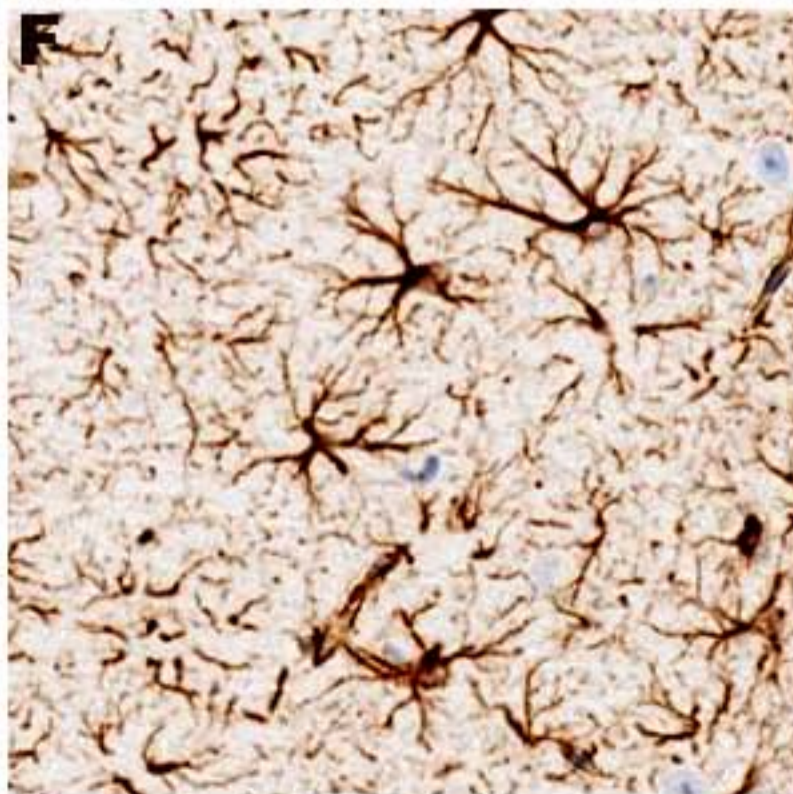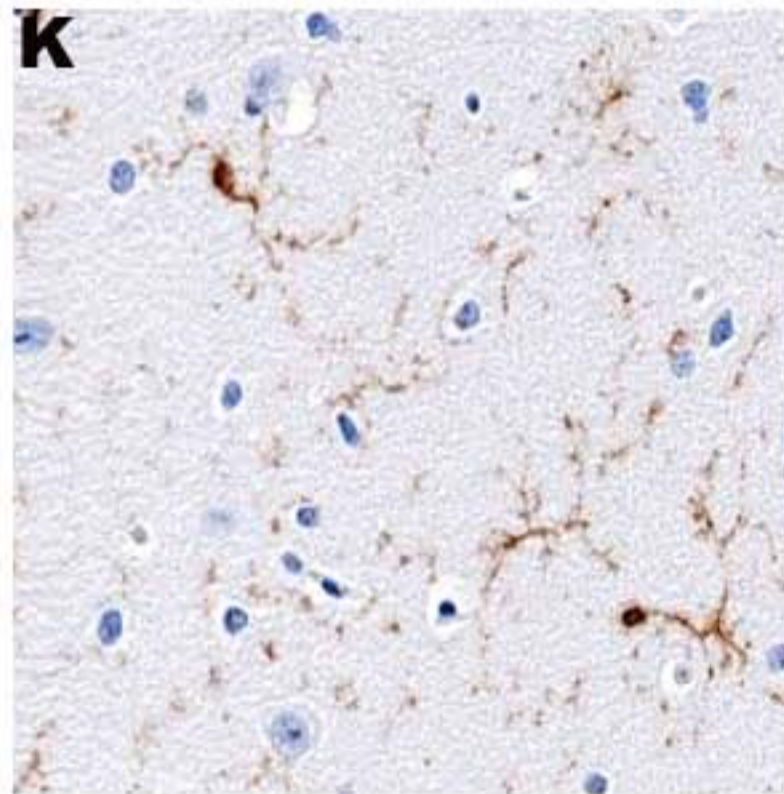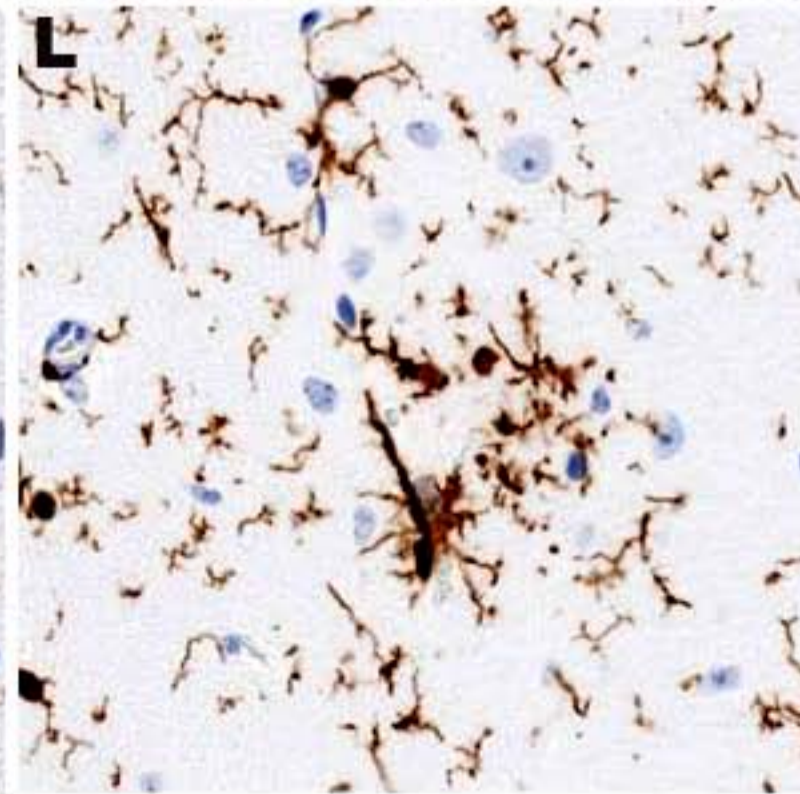**Suppl. Fig. 2**

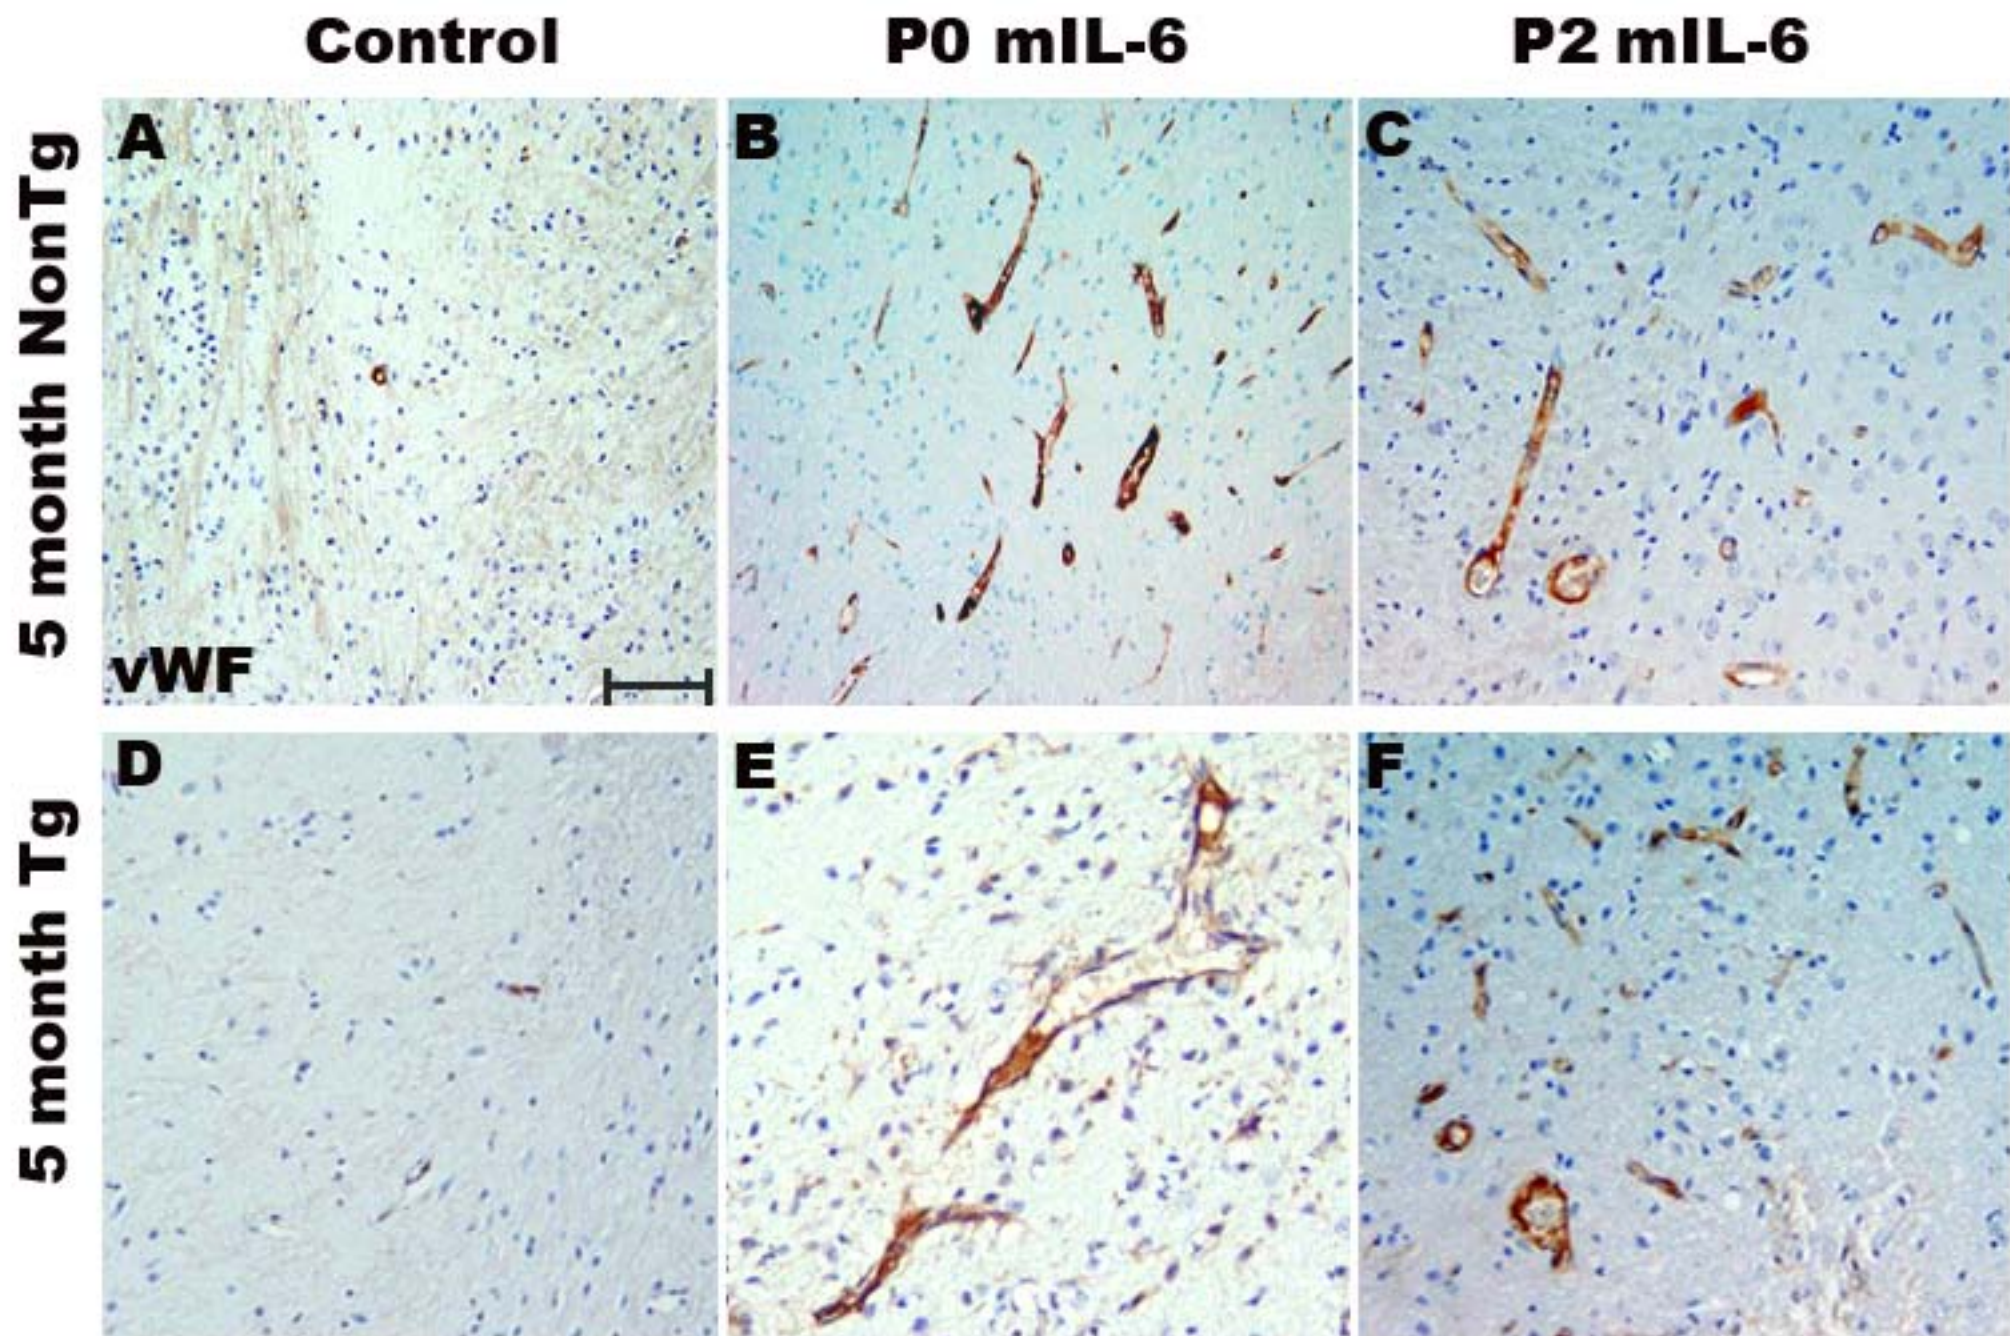

**Suppl. Fig. 3**

**Control****mIL-6****mIL-6**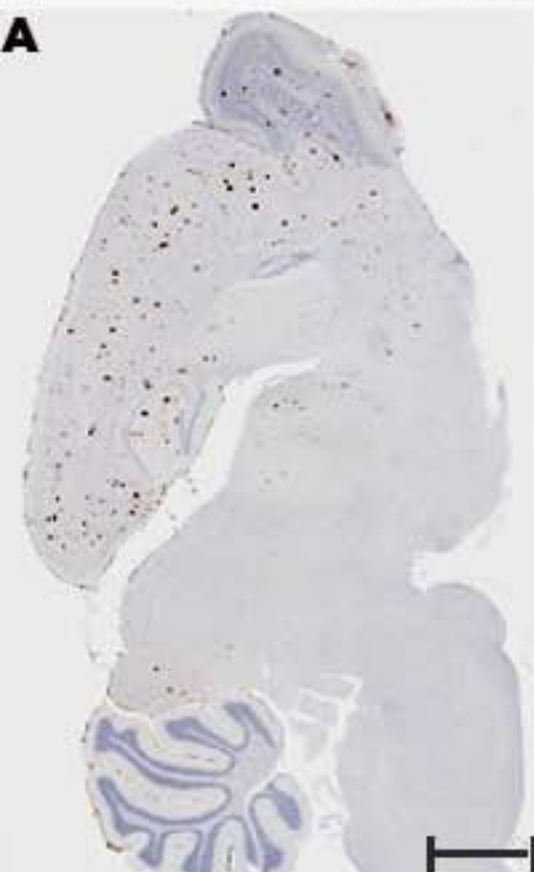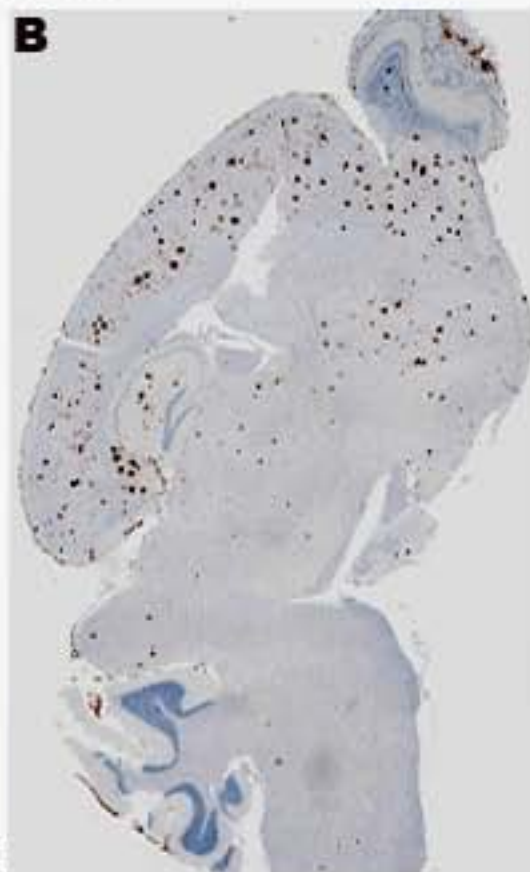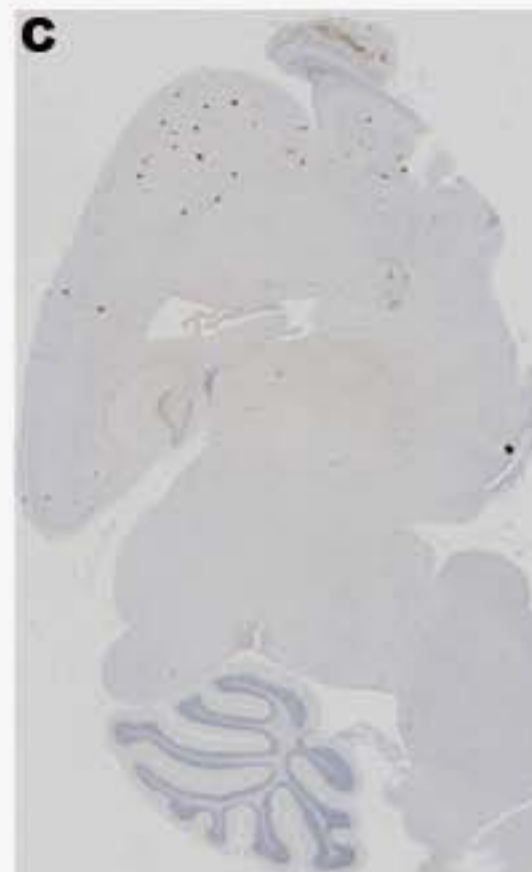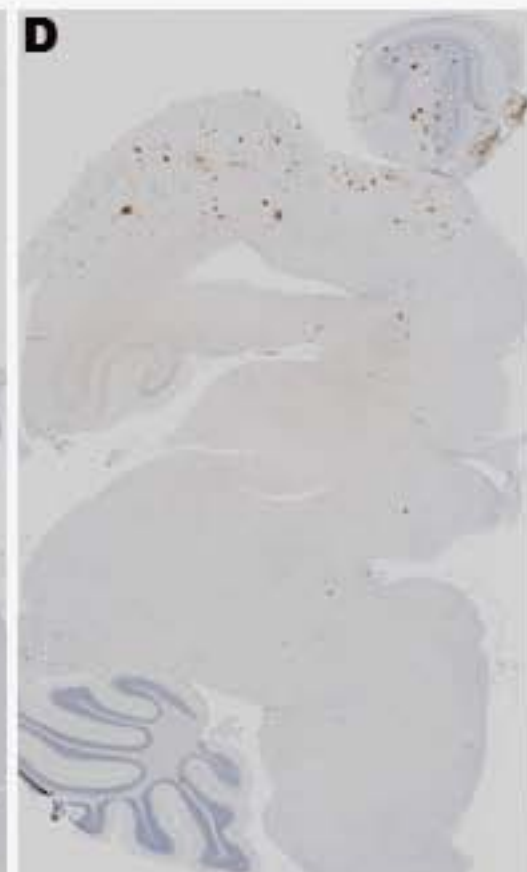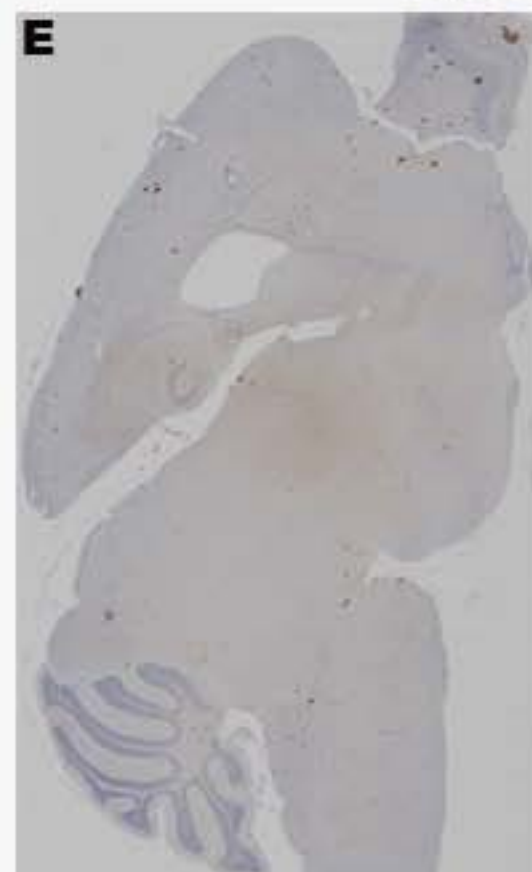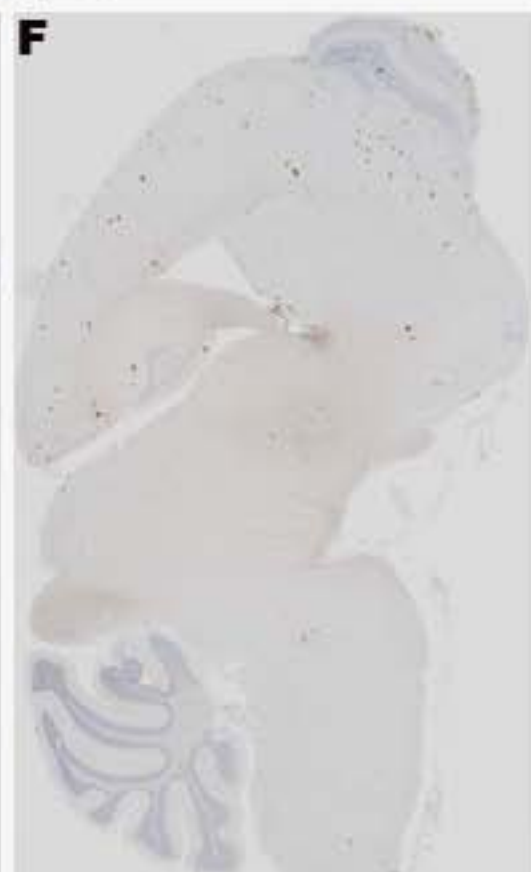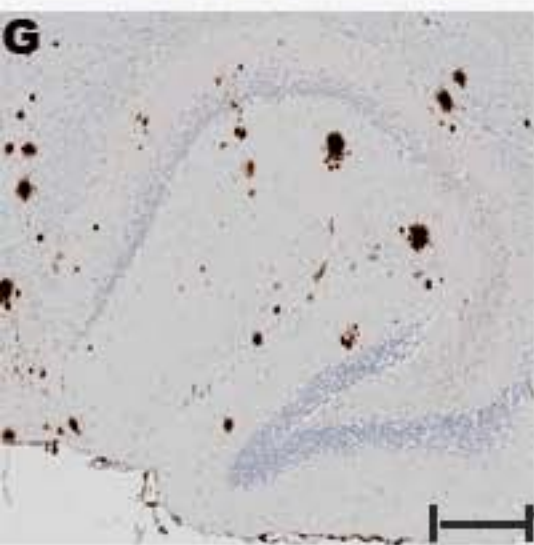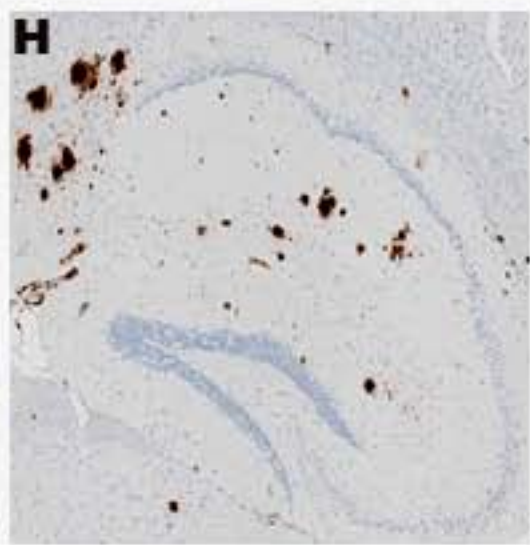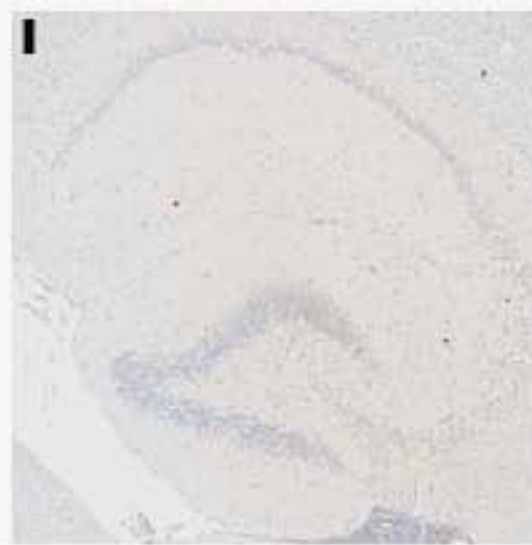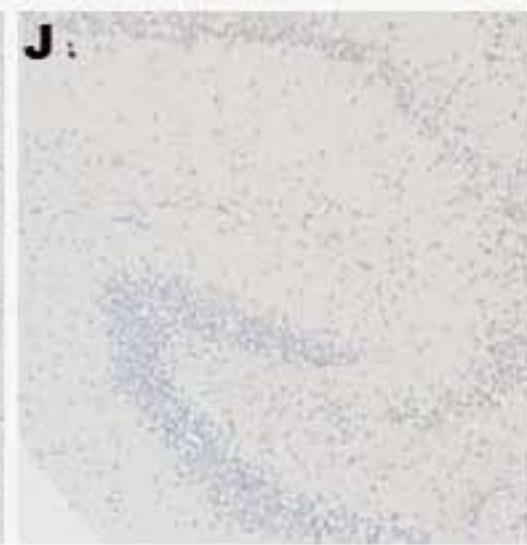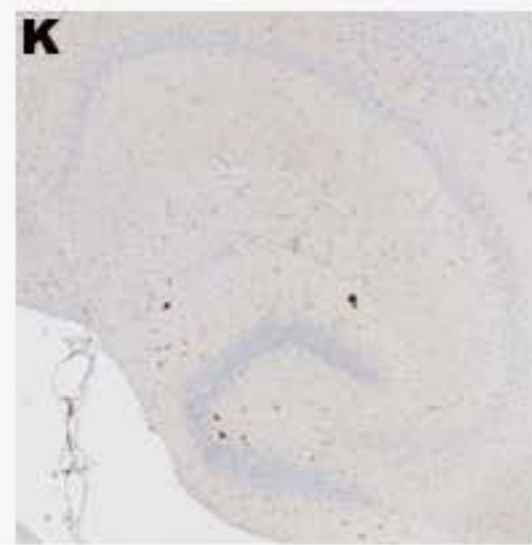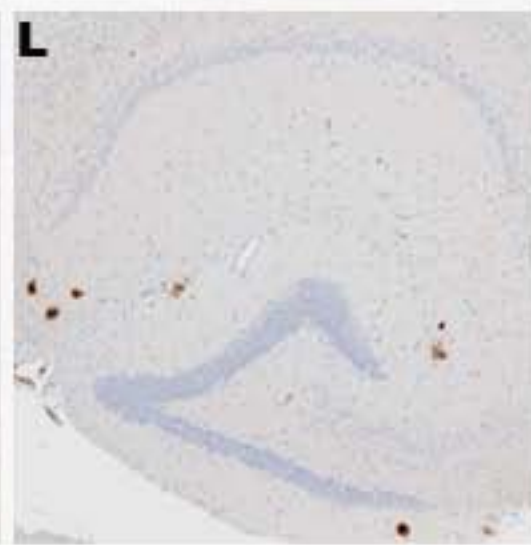**Suppl. Fig. 4**

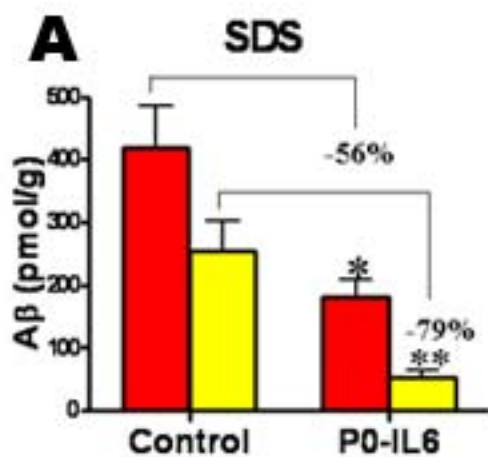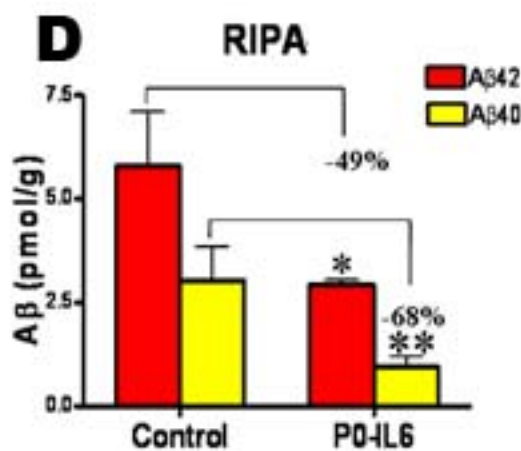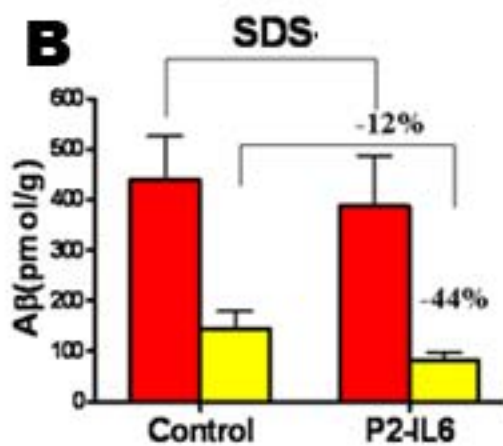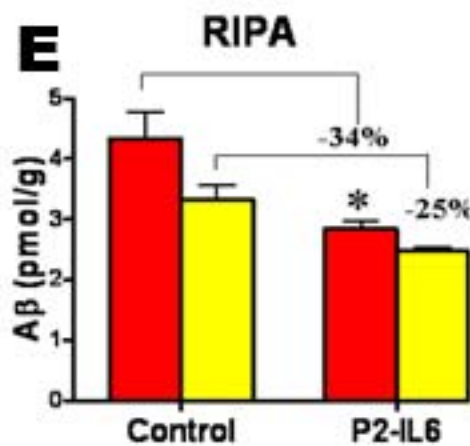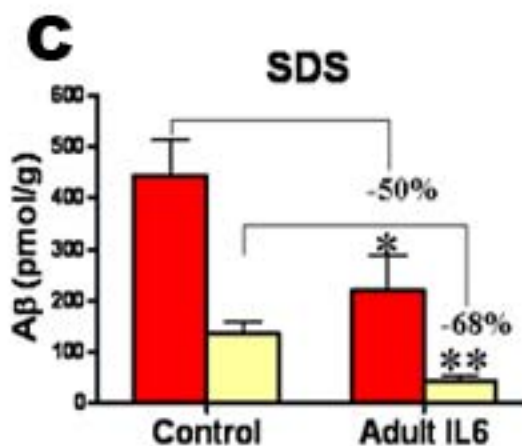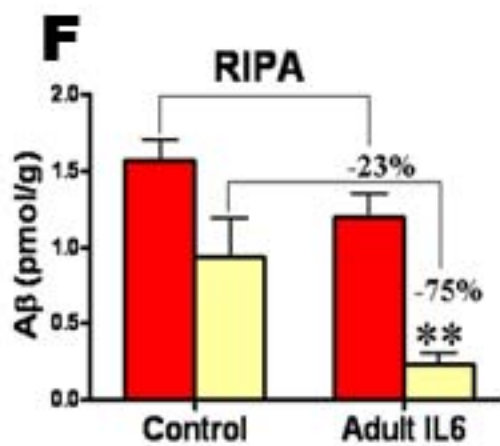

**Suppl. Fig.5**

**A**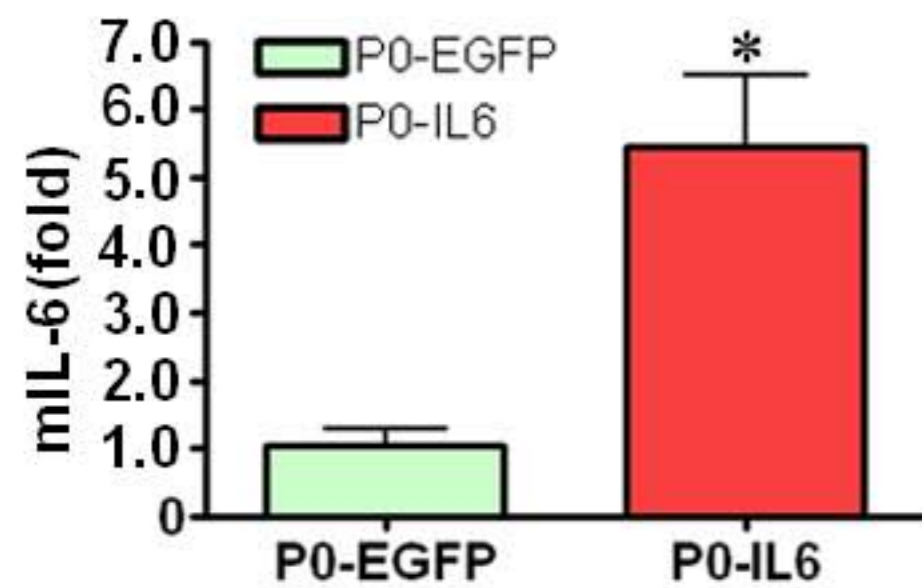**B**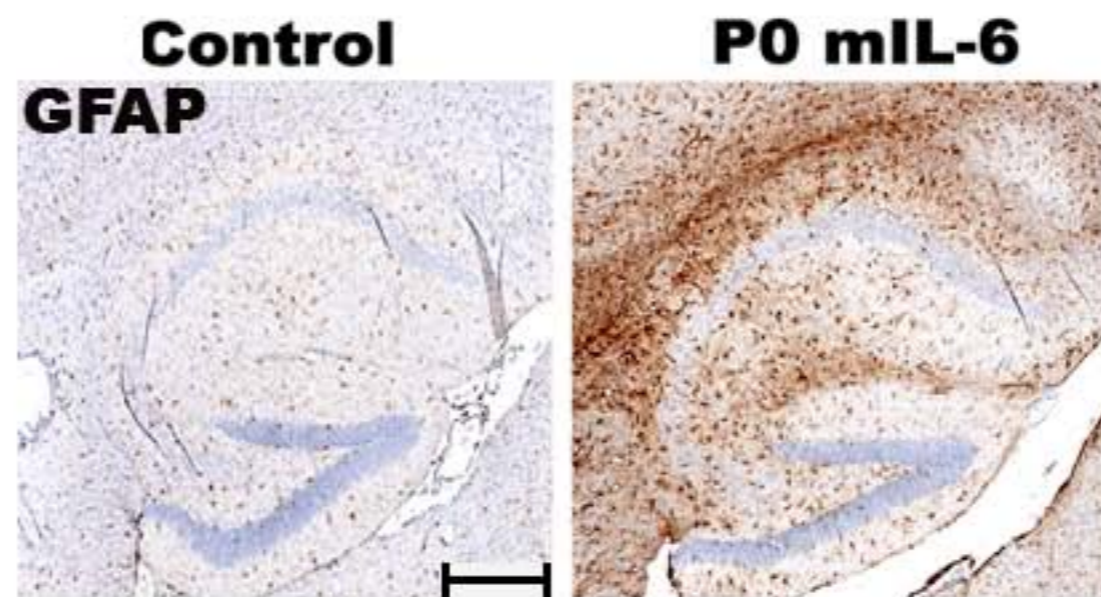**C**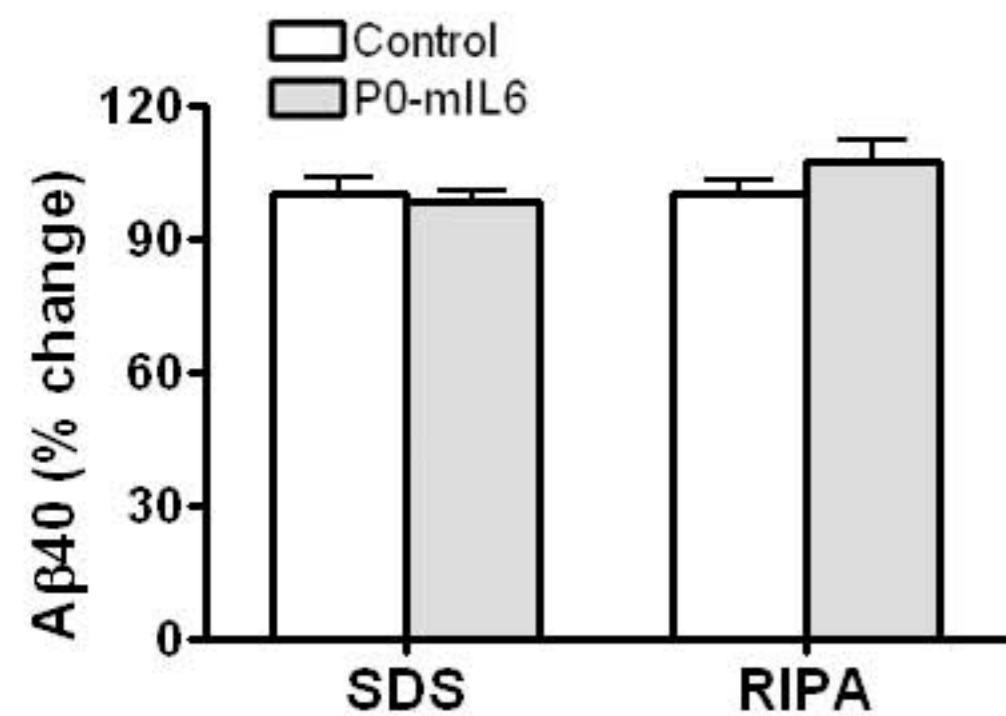**D**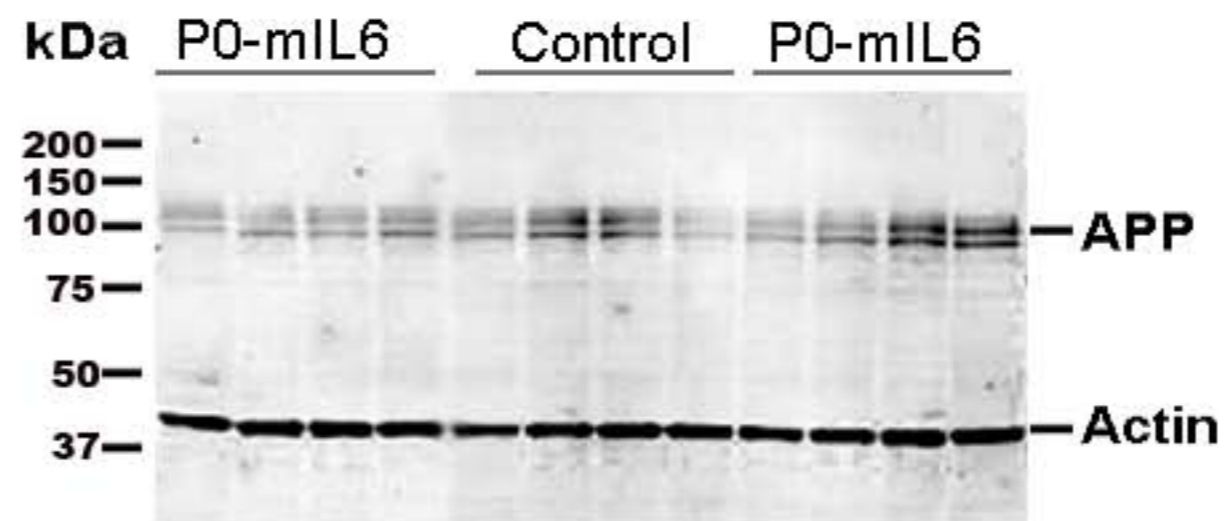**E**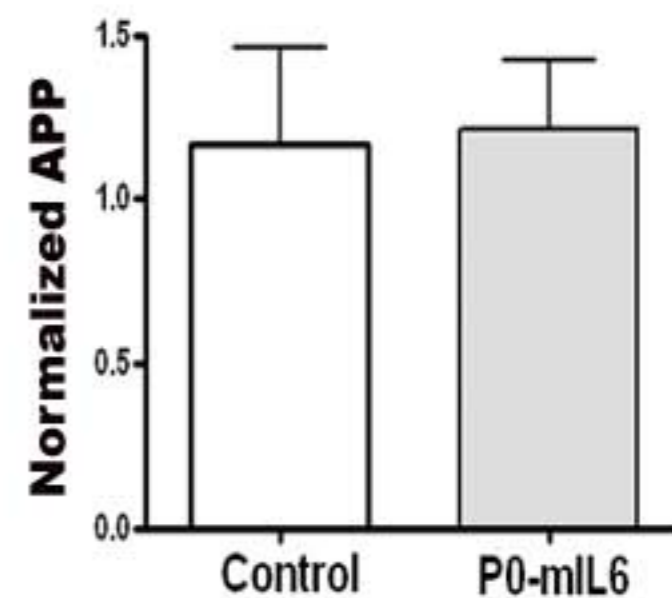**Suppl. Fig 6**

## **SUPPLEMENTARY MATERIALS**

### **Supplementary Figure Legends**

#### **Suppl. Fig 1. Gliosis profile in mIL-6 injected P0→5mo CRND8 mice.**

**A-B.** Representative immunoblot of GFAP levels in P0→5mo and P2→5mo mIL-6 injected TgCRND8 mice compared to controls (“Ct”) (A). Intensity analysis of GFAP immunoreactive bands normalized to  $\beta$  actin is depicted (B) (\* $p < 0.05$ ).

**C-N.** Upregulation of GFAP positive astrocytes as well as Iba-1 positive microglia in P0→5mo mIL-6 injected non-transgenic CRND8 littermates (“NonTg-mIL6”) compared to age-matched controls (“NonTg-Control”). The top panels (C, D, I, J) show the whole brain sections whereas the bottom panels (E-H, K-N) show higher magnifications of the corresponding hippocampus. *Scale Bar*, 600 $\mu$ m (C, D, I, J), 150  $\mu$ m (E, F, K, L) and 25  $\mu$ m (G, H, M, N).

#### **Suppl. Fig 2. AAV1-mIL-6 expression following stereotaxic injection in the hippocampus of young adult TgCRND8 mice results in reactive astrogliosis and microgliosis.**

AAV1-mIL-6 or AAV1-EGFP was injected into the hippocampus of 4 month old TgCRND8 mice and brain sections analyzed after 6 weeks. Whole brain panels showing a coronal section in the immediate vicinity of AAV1 injection site was stained with anti-GFAP (**A-F**) or anti-Iba-1 (**G-L**) antibodies. Whole brain sections on top and

higher magnification panels below highlight the activated glial morphology in the hippocampus of mIL-6 expressing mice (“Tg-mIL6”) compared to EGFP expressing mice (“Tg-Control”). *Scale Bar*, 600µm (A, B, G, H), 150µm (C, D, I, J) and 25µm (E, F, K, L).

**Suppl. Fig 3. Proliferative angiopathy in P0→5mo mIL-6 expressing CRND8 mice.**

Representative micrographs of 5 month old non-transgenic littermates (B, C) and transgenic TgCRND8 mice (E, F) injected with AAV1-mIL-6 on day P0 (B, E) or day P2 (C, F) showing extensive proliferative angiopathy compared with age matched control mice (A, nontransgenic control and D, transgenic control). *Scale Bar*, 25 µm.

**Suppl. Fig 4. Significant attenuation of Aβ deposition in P0→5mo and P2→5mo AAV1-mIL-6 expressing TgCRND8 mice.**

TgCRND8 mice injected with AAV1-mIL-6 or AAV1-EGFP on neonatal day P0 (E-L) or P2 (C-J) and then analyzed at 5 months. Representative whole brain sections (A-F) and corresponding hippocampus (G-L) stained with 33.1.1 antibody (pan Aβ1-16) of 2 mice from each paradigm is shown. *Scale Bar*, 600µm (A-F), 150 µm (G-L).



**Suppl. Fig. 5. Attenuation in RIPA and SDS extractable A $\beta$  levels in mL-6 injected mice.**

Biochemical analyses of SDS and RIPA extractable A $\beta$ 42 and A $\beta$ 40 levels in P0→5mo mL-6 expressing TgCRND8 mice (A, D), P2→5mo mL-6 expressing CRND8 mice (B, E), and 4→5.5mo mL-6 expressing TgCRND8 (C, F) compared to EGFP expressing age matched controls (\* $p$ <0.05 and \*\* $p$ <0.05).

**Suppl. Fig 6. No evidence of changes in steady state A $\beta$  production or APP levels in mL-6 injected P0→3mo Tg2576 mice.**

**A.** P0 AAV1-mL-6 injected 3 month old Tg2576 mice show increased levels of mL-6 in the RIPA soluble brain extracts compared to age-matched control mice ( $n$ =6-9/group). \* $p$ <0.05

**B.** Increased GFAP immunoreactive astrocytes is evident in paraffin embedded brain sections of P0→3mo mL-6 injected Tg2576 mice compared to controls. *Scale Bar*, 150 $\mu$ m

**C.** Steady state levels of A $\beta$ 40 is not significantly altered in mL-6 expressing Tg2576 mice at 3 months ( $n$ =6-9/group) as measured by ELISA using RIPA soluble brain extracts.

**D-E.** Representative anti CT20 immunoblot showing no significant changes in APP levels in 3 month old Tg2576 mice injected with AAV1-mIL-6 on day P0 compared to age-matched controls (D). Quantitative analysis of anti CT20 immunoreactive APP levels was normalized to  $\beta$  actin in P0→3mo Tg2576 mice (E).

**Supplementary Table 1: Summary of changes in A $\beta$  levels following rAAV1 mediated overexpression of mIL-6 in mice brain.**

| Mouse   | mIL6 (fold over control) | Injection  | Length of treatment | FA A $\beta$ 42 (% over control) | FA A $\beta$ 40 (% over control) | Forebrain plaque burden (% change) |
|---------|--------------------------|------------|---------------------|----------------------------------|----------------------------------|------------------------------------|
| TgCRND8 | 7.81 *                   | P0         | 5 mo                | -60 *                            | -89 *                            | -67 *                              |
| TgCRND8 | 3.42 *                   | P2         | 5 mo                | -56 *                            | -62 *                            | -50 *                              |
| TgCRND8 | 2.0                      | 4 mo adult | 1.5 mo              | -47                              | -73 *                            | -60 *                              |
| Tg2576  | 5.5*                     | P0         | 3 mo                | -                                | -1.6 (SDS A $\beta$ 40)          | -                                  |

\* $p < 0.05$
